# Supplementary material
Source: PubMed Central journal article supplement (PMC7870746)
Supplement: 12264_2020_607_MOESM1_ESM.pdf [file 12264_2020_607_MOESM1_ESM.pdf]

**Table S1 Summary of RNA-seq Data Used in this study**

| Abbreviation              | Sample                                                                        | Dissection method                   | Age of animal | Type of Reads | Reads length | Reads Number | GEO #    | Reference    |
|---------------------------|-------------------------------------------------------------------------------|-------------------------------------|---------------|---------------|--------------|--------------|----------|--------------|
| <b>ESC</b>                | mouse embryonic stem cell                                                     | cell culture                        | -             | Paired        | 76 bp        | 115 million  | GSE20851 | Guttman 2010 |
| <b>NPC</b>                | mouse embryonic stem cell derived neural progenitor cells                     | cell culture                        | -             | Paired        | 76 bp        | 119 million  | GSE20851 | Guttman 2010 |
| <b>E14.5_VZ</b>           | mouse E14.5 ventricular zone                                                  | Laser dissection                    | E14.5         | Paired        | 75 bp        | 107 million  | GSE30765 | Ayoub 2011   |
| <b>E14.5_SVZ/IZ</b>       | mouse E14.5 subventricular zone/ intermediate zone                            | Laser dissection                    | E14.5         | Paired        | 75 bp        | 103 million  | GSE30765 | Ayoub 2011   |
| <b>E14.5_CP</b>           | mouse E14.5 cortical plate                                                    | Laser dissection                    | E14.5         | Paired        | 75 bp        | 110 million  | GSE30765 | Ayoub 2011   |
| <b>E17-Cortex</b>         | mouse E17 cortex                                                              | microdissection                     | E17           | Single        | 80 bp        | 159 million  | GSE39866 | Dillman 2013 |
| <b>E10.5-Cortex</b>       | ENCODE mouse E10.5 embryonic forebrain                                        | microdissection                     | E10.5         | Single        | 100 bp       | 101 million  | GSE88173 | ENCODE       |
| <b>E11.5-Cortex</b>       | ENCODE mouse E11.5 embryonic forebrain                                        | microdissection                     | E11.5         | Single        | 100 bp       | 80 million   | GSE78335 | ENCODE       |
| <b>E12.5-Cortex</b>       | ENCODE mouse E12.5 embryonic forebrain                                        | microdissection                     | E12.5         | Single        | 100 bp       | 126 million  | GSE82852 | ENCODE       |
| <b>E13.5-Cortex</b>       | ENCODE mouse E13.5 embryonic forebrain                                        | microdissection                     | E13.5         | Single        | 100 bp       | 106 million  | GSE78493 | ENCODE       |
| <b>E14.5-Cortex</b>       | ENCODE mouse E14.5 embryonic forebrain                                        | microdissection                     | E14.5         | Single        | 100 bp       | 93 million   | GSE78340 | ENCODE       |
| <b>E15.5-Cortex</b>       | ENCODE mouse E15.5 embryonic forebrain                                        | microdissection                     | E15.5         | Single        | 100 bp       | 100 million  | GSE78448 | ENCODE       |
| <b>E16.5-Cortex</b>       | ENCODE mouse E16.5 embryonic forebrain                                        | microdissection                     | E16.5         | Single        | 100 bp       | 82 million   | GSE78323 | ENCODE       |
| <b>P0-Cortex</b>          | ENCODE mouse postnatal 0 forebrain                                            | microdissection                     | P0            | Single        | 100 bp       | 92 million   | GSE78374 | ENCODE       |
| <b>aRG</b>                | mouse E14.5 apical radial glia                                                | Fluorescence activated Cell Sorting | E14.5         | Single        | 75 bp        | 150 million  | GSE65000 | Huttner 2015 |
| <b>bRG</b>                | mouse E14.5 basal (outer) radial glia                                         | Fluorescence activated Cell Sorting | E14.5         | Single        | 75 bp        | 136 million  | GSE65000 | Huttner 2015 |
| <b>bIP</b>                | mouse E14.5 basal intermediate progenitor                                     | Fluorescence activated Cell Sorting | E14.5         | Single        | 75 bp        | 133 million  | GSE65000 | Huttner 2015 |
| <b>Neuron</b>             | mouse E14.5 neuron                                                            | Fluorescence activated Cell Sorting | E14.5         | Single        | 75 bp        | 168 million  | GSE65000 | Huttner 2015 |
| <b>Tis+</b>               | mouse E14.5 Tis21+ apical radial glia                                         | Fluorescence activated Cell Sorting | E14.5         | Single        | 75 bp        | 172 million  | GSE65000 | Huttner 2015 |
| <b>Tis-</b>               | mouse E14.5 Tis21- apical radial glia                                         | Fluorescence activated Cell Sorting | E14.5         | Single        | 75 bp        | 162 million  | GSE65000 | Huttner 2015 |
| <b>E10.5_DFB (Cortex)</b> | ribosomal-depleted and strand-specific mouse E10.5 embryonic dorsal forebrain | microdissection                     | E10.5         | Paired        | 90 bp        | 202 million  | GSE55600 | This work    |
| <b>E12.5_DFB (Cortex)</b> | ribosomal-depleted and strand-specific mouse E12.5 embryonic dorsal forebrain | microdissection                     | E12.5         | Paired        | 90 bp        | 208 million  | GSE55600 | This work    |
