# Supplementary material
Source: PubMed Central journal article supplement (PMC7870746)
Supplement: 12264_2020_607_MOESM5_ESM.pdf [file 12264_2020_607_MOESM5_ESM.pdf]

Table S5 Oligo Sequences and Antibodies

|                                                                                                                                                                                                                                                                                                   |                                                                                                                                                                                                                |                                                                                                                                                                                                                                                                                  |
|---------------------------------------------------------------------------------------------------------------------------------------------------------------------------------------------------------------------------------------------------------------------------------------------------|----------------------------------------------------------------------------------------------------------------------------------------------------------------------------------------------------------------|----------------------------------------------------------------------------------------------------------------------------------------------------------------------------------------------------------------------------------------------------------------------------------|
| <b>Gene-specific shRNA</b><br>SenZfp536 sh1<br>SenZfp536 sh2<br>Zfp536 sh1                                                                                                                                                                                                                        | <b>Target sequence</b><br>TGAAGTCCAGGTTTCAAATAA<br>GTTACAAGTTAGGTCATTTAT<br>CCGGAGTCCATTTGCATAATT                                                                                                              |                                                                                                                                                                                                                                                                                  |
| <b>Gene-specific sgRNA for CRISPR-on assay</b><br>SenZfp536 sg1<br>SenZfp536 sg2<br>SenZfp536 sg3<br>SenZfp536 sg4<br>SenZfp536 sg5                                                                                                                                                               | <b>Target sequence</b><br>GCTGGTATATCAGCGTGTCA<br>TATGGGACTCATCACCCAAG<br>GATATACCAGCCTTTAAGCA<br>GCCAAAACTTTTGCTTCTGG<br>GTACCGTACGAACGTAGCAG                                                                 |                                                                                                                                                                                                                                                                                  |
| <b>Gene-specific sgRNA for RNA-tethering assay</b><br>Zfp536 sgRNA                                                                                                                                                                                                                                | <b>Target sequence</b><br>CCTGGCGACCCTCCGTGCG                                                                                                                                                                  |                                                                                                                                                                                                                                                                                  |
| <b>In situ hybridization</b><br>SenZfp536<br>Zfp536                                                                                                                                                                                                                                               | <b>Forward sequence (5'-3')</b><br>GGCTTTAAGACTTGCCCTGGGAG<br>GTGTGCTCGACTCTGCTCC                                                                                                                              | <b>Reverse sequence (5'-3')</b><br>GGAACTCGTTTGCTGACTGCTC<br>CACAATGGCGTCCCCACAAC                                                                                                                                                                                                |
| <b>Gene expression analysis</b><br>SenZfp536<br>Zfp536<br>Xist<br>Actin<br>Gapdh                                                                                                                                                                                                                  | <b>Forward sequence (5'-3')</b><br>CGCCAGCATTCTTTCTTGTG<br>ACTCATACAGTAGCAGCGTC<br>TAGGTGGAGATGGGGCATGA<br>ATCTTCCGCCTTAATACT<br>TGTGTCCGCTCGTGATCTG                                                           | <b>Reverse sequence (5'-3')</b><br>AAGTTGTGGGTGTCAGAGTGCT<br>AGCCACAGAGTTCCGTCTTG<br>CTGGGTTCCAGGAAAAGCGTCT<br>GCCTTCATACATCAAGTT<br>TTGCTGTTGAAGTCGCAGGAG                                                                                                                       |
| <b>RACE nested primers</b><br>SenZfp536 5' RACE<br>SenZfp536 3' RACE                                                                                                                                                                                                                              | <b>First primer (5'-3')</b><br>TGCGTACACATACCTATGCCCGTA<br>CTGTATAGAGTCAGAGAGGCTGAGA                                                                                                                           | <b>Second primer (5'-3')</b><br>CTGCAGATAAACCCACAAAGGAGCA<br>CCCACATGTTTGCCAATAGTAATGG                                                                                                                                                                                           |
| <b>Northern blot</b><br>SenZfp536 probe                                                                                                                                                                                                                                                           | <b>Forward sequence (5'-3')</b><br>TCTGCTCCTGAGAAGTTGGCCC                                                                                                                                                      | <b>Reverse sequence (5'-3')</b><br>GCAATATCTGAGAGGTCATCAGT                                                                                                                                                                                                                       |
| <b>3C primers</b><br>Constant primer<br>T1<br>T2<br>T3<br>T4<br>T5<br>T6                                                                                                                                                                                                                          | <b>Primer sequence</b><br>ATGCAAATGGACTCCGGCCGG<br>GGACAGAAGGAGTGCACCATTGT<br>GTCATCTCAGGCCTTTCTCCAG<br>ATGCAGCAAAAGGCAAGGAACA<br>GAAATTGTCCATGCATGGGTGG<br>TCTGAATGTGTGGGTAAAGGCGC<br>ATGACAGGCCAGTGGTCTTTTGA |                                                                                                                                                                                                                                                                                  |
| <b>Antibodies</b><br>Mouse monoclonal to $\beta$ -Actin<br>Rat monoclonal to BrdU<br>Rabbit polyclonal to GFP<br>Rabbit polyclonal to PAX6<br>Rabbit polyclonal to SOX2<br>Sheep anti-DIG AP<br>Rabbit polyclonal to ZFP536<br>Rabbit monoclonal to Cleaved Caspase 3<br>Mouse monoclonal to Ki67 | <b>Source</b><br>Chemicon<br>Abcam<br>Invitrogen<br>Chemicon<br>Millipore<br>Roche<br>ORIGENE<br>Cell Signaling<br>Cell Signaling                                                                              | <b>Identifier</b><br>MAB1501; RRID: AB_2223041<br>ab6326; RRID: AB_305426<br>A11122; RRID: AB_221569<br>AB2237; RRID: AB_1587367<br>ab5603; RRID: AB_2286686<br>11093274910; RRID: AB_514497<br>AP23921PU-N; RRID: AB_2468824<br>9664; RRID: AB_004098<br>9449; RRID: AB_2797703 |
